# Supplementary material
Source: PubMed Central journal article supplement (PMC2838282)
Supplement: supp_M109.060863_Suppdata.pdf [file supp_M109.060863_Suppdata.pdf]

**Supplemental Data** for “INTEIN-MEDIATED CYCLIZATION OF BACTERIAL ACYL CARRIER PROTEIN STABILIZES ITS FOLDED CONFORMATION BUT DOES NOT ABOLISH FUNCTION” by Volkmann *et al*

**TABLE S1. Primers used in this study**

| <i>Primer</i>         | <i>Sequence (5'—3')</i>                                      |
|-----------------------|--------------------------------------------------------------|
| IC- <i>for</i>        | GGGAGCTCATGGAAGCAGTATTAATTACAATCAC                           |
| IC- <i>rev</i>        | GACTAATGTATCTCCAGAAAAACAGGAAGAGCATATGCTAGCGCTGTTATGGACAAACAC |
| ICMUT- <i>rev</i>     | GACTAATGTATCTCCAGAAAAAGCGGAAGAGCATATGCTAGCGCTTGCATGGACAAACAC |
| IN- <i>for</i>        | GTGTTTGTCCATAACAGCGCTAGCATATGCTCTTCCTGTTTTTCTGGAGATACATTAGTC |
| INMUT- <i>for</i>     | GTGTTTGTCCATGCAAGCGCTAGCATATGCTCTTCCGCTTTTTCTGGAGATACATTAGTC |
| INHIS- <i>rev</i>     | GGCTGCAGTTAATGGTGATGGTGATGGTGATGACCAGAATCTTCC                |
| ACP- <i>for</i>       | GGGCTAGCAACATCGAAGAACGCGTAAAGAAAATC                          |
| ACP- <i>rev</i>       | GGGGCTCTTCTACAACCCTGAGCGCTGTTTACG                            |
| GSTC- <i>for</i>      | GGGTGGCCATCATAACGTTATATAGCTGACAAGC                           |
| GSTC- <i>rev</i>      | CGTTCTTCGATGTTGCTAGCAGAACGACCTTCGATCAGATCC                   |
| LINL46W- <i>for</i>   | GGATCTGATCGAAGGTCGTTCTGCTAGCAACATCGAAGAACG                   |
| LINL46W- <i>for</i> 2 | CCCATATGTCTGCTAGCAACATCGAAGAACGCG                            |
| LINL46W- <i>rev</i>   | GGGAGCGCTTCATTAACCCTGAGCAGAGTTTACGTAGTCG                     |
| LINL46W- <i>rev</i> 2 | CCCTGCAGTCATTAACCCTGAGCAGAGTTTACG                            |
| LINF50A- <i>for</i>   | GAGGCTGACACTGAGATTCCTGATGAAG                                 |
| LINF50A- <i>rev</i>   | CTCTTCCAGAGCCATTACTAGCTCTACAGTG                              |

**TABLE S2. Bacterial strains and plasmids used in this study**

| <i>Strain or plasmid</i>                                    | <i>Relevant features or description</i>                                                                                                                                                                                                                                                        | <i>Source</i>       |
|-------------------------------------------------------------|------------------------------------------------------------------------------------------------------------------------------------------------------------------------------------------------------------------------------------------------------------------------------------------------|---------------------|
| Strains                                                     |                                                                                                                                                                                                                                                                                                |                     |
| BL21(DE3)pLysS                                              | <i>ompT</i>                                                                                                                                                                                                                                                                                    | <sup>a</sup>        |
| CY1861                                                      | $\Delta$ <i>acpP::cat</i> pACYC/ <i>acpP</i>                                                                                                                                                                                                                                                   | This study          |
| Plasmids                                                    |                                                                                                                                                                                                                                                                                                |                     |
| pT <sub>I<sub>C</sub></sub> (NS) <sub>I<sub>N</sub></sub> H | Permuted <i>Synechocystis ssp.</i> PCC6803 GyrB split-intein sequence cloned into <i>SacI/PstI</i> sites of pT; contains <i>NheI</i> and <i>SapI</i> sites between I <sub>C</sub> and I <sub>N</sub> sequences, respectively, for insertion of target protein sequence for in vivo cyclization | This study          |
| pTCYC-L46W                                                  | <i>Vibrio harvei</i> ACP L46W mutant cloned into pT <sub>I<sub>C</sub></sub> (NS) <sub>I<sub>N</sub></sub> H via <i>NheI</i> and <i>SapI</i> .                                                                                                                                                 | This study          |
| pTCYC-F50A                                                  | As pTCYC-L46W, but with F50A mutation in place of L46W                                                                                                                                                                                                                                         | This study          |
| pTPRE-L46W-mut                                              | Cyclization-deficient control construct of pTCYC-L46W, with C1A mutation in I <sub>C</sub> and N435A mutation in I <sub>N</sub>                                                                                                                                                                | This study          |
| pMAL                                                        | Expression of <i>malE</i> from P <sub>tac</sub> promoter                                                                                                                                                                                                                                       | New England Biolabs |
| pMCYC-L46W                                                  | Amp <sup>r</sup> , L46W cyclization ORF cloned into <i>NdeI/PstI</i> sites of pMAL                                                                                                                                                                                                             | This study          |
| pMCYC-F50A                                                  | As pMCYC-L46W, but with F50A mutation in place of L46W                                                                                                                                                                                                                                         | This study          |
| pMPRE-L46W-mut                                              | Cyclization-deficient control construct of pMCYC-L46W                                                                                                                                                                                                                                          | This study          |
| pMLIN-L46W                                                  | Encodes linear equivalent to cycl46W protein, cloned between <i>NdeI/PstI</i> sites of pMAL                                                                                                                                                                                                    | This study          |
| pMLIN-F50A                                                  | As pMLIN-L46W, but with F50A mutation in place of L46W                                                                                                                                                                                                                                         | This study          |
| pGEX-linL46W                                                | Amp <sup>r</sup> , expression of GST-linL46W fusion protein from P <sub>tac</sub> promoter                                                                                                                                                                                                     | This study          |
| pGEX-F50A                                                   | Amp <sup>r</sup> , expression of GST-F50A fusion protein from P <sub>tac</sub> promoter                                                                                                                                                                                                        | (20)                |

<sup>a</sup> Studier, F.W. and Moffatt, B.A. (1986) *J. Mol. Biol.* **189**, 113-130
